# Supplementary material
Source: PubMed Central journal article supplement (PMC8670735)
Supplement: NIHMS1723992-supplement-Supplementary_table_1.pdf [file NIHMS1723992-supplement-Supplementary_table_1.pdf]

**Supp Table 1. Top 20 features of classified CD45+ subsets**

|    | <b>B cell</b> | <b>T cell</b> | <b>NK</b> | <b>TAM</b> | <b>MDSC</b> | <b>Other Myeloid</b> |
|----|---------------|---------------|-----------|------------|-------------|----------------------|
| 1  | Cd79a         | Bcl11b        | Gzma      | C1qc       | Retnlg      | Ramp2                |
| 2  | Fcmmr         | Cd3e          | Cma1      | C1qa       | S100a9      | Egfl7                |
| 3  | Ebf1          | Cd3d          | Klra9     | C1qb       | S100a8      | Cldn5                |
| 4  | Cd79b         | Cd3g          | Klra8     | Mgl2       | Mmp9        | Plvap                |
| 5  | Ms4a1         | Nsg2          | Serpnb9b  | Chil3      | Cxcr2       | Foxf1                |
| 6  | Vpreb3        | Cd8b1         | Ncr1      | Trem2      | Stfa211     | Tmem100              |
| 7  | Ighd          | Trbc2         | Klra4     | Aif1       | Asprv1      | Adgrf5               |
| 8  | Pax5          | Cd5           | Klrb1a    | Mrc1       | Cstdc4      | Tspan7               |
| 9  | Fcer2a        | Cd28          | Phactr3   | Clec10a    | G0s2        | Gpihbp1              |
| 10 | Bank1         | Themis        | Prf1      | Msr1       | Hdc         | Sema3c               |
| 11 | Tnfrsf13c     | Lef1          | Klrb1c    | Slamf8     | Trem1       | Clec14a              |
| 12 | Gm42870       | Trac          | Klri2     | Gatm       | Il1f9       | Cav1                 |
| 13 | Gm30211       | Tcf7          | Khdc1a    | Fn1        | Nlrp12      | Cdh5                 |
| 14 | Cd19          | Il7r          | Klra3     | Mafb       | Csf3r       | Cyp4b1               |
| 15 | Gm31243       | Lat           | Klra13-ps | Ms4a6c     | Mrgpra2b    | Aqp1                 |
| 16 | Iglc3         | Cxcr6         | Adamts14  | Fcgr1      | H2-Q10      | Lyve1                |
| 17 | Pou2af1       | Klk8          | Klre1     | Cxcl16     | Mirt2       | Epas1                |
| 18 | Cr2           | Cd6           | Styk1     | Ppfia4     | Cxcl2       | Ptprb                |
| 19 | Srpk3         | Tnfsf8        | Gm14125   | Tifab      | Slc40a1     | Fmo1                 |
| 20 | Fcrla         | Icos          | Klrb1f    | Axl        | Arg2        | Cyrr1                |

**Supp Table 2. Top 20 features of classified T cell subsets**

|    | <b>Cluster1</b> | <b>Cluster2</b> | <b>Cluster3</b> | <b>Cluster4</b> | <b>Cluster5</b> | <b>Cluster6</b> | <b>Cluster7</b> | <b>Cluster8</b> | <b>Cluster9</b> |
|----|-----------------|-----------------|-----------------|-----------------|-----------------|-----------------|-----------------|-----------------|-----------------|
| 1  | Igfbp4          | mt-Rnr2         | Tmem176b        | Klrb1c          | Lag3            | Ly6c2           | Cd8b1           | Foxp3           | Pclaf           |
| 2  | Pdlim4          | Klra4           | Tmem176a        | Klrc2           | Rgs16           | Cd8a            | Cd8a            | Ctla4           | Birc5           |
| 3  | Ly6c1           | CT010467.1      | Serpnb1a        | Klrk1           | Pdcd1           | Plac8           | Dapl1           | Tnfrsf4         | Cdk1            |
| 4  | Lef1            | Srrm2           | Ramp3           | Ccl5            | Igfbp7          | Ms4a4c          | Ccr7            | Tnfrsf9         | Ccna2           |
| 5  | Ccr7            | Gzma            | Rora            | Ly6c2           | Rbpj            | Cd8b1           | Fam241a         | Glrx            | Spc24           |
| 6  | Satb1           | Gm13340         | Pxdc1           | Fcer1g          | Nrgn            | Ctsw            | Gm43698         | Ikzf2           | Cks1b           |
| 7  | C230085N15Rik   | mt-Rnr1         | Mmp25           | Cd7             | Bcl2a1d         | Gm19705         | Ccr9            | Il2ra           | Hist1h1b        |
| 8  | Klf2            | Wdr26           | Il17re          | Klra7           | Gpm6b           | Jaml            | Lef1            | Capg            | Rrm2            |
| 9  | St8sia6         | Arglu1          | S100a4          | Klrd1           | Mir155hg        | Fam241a         | Klf2            | Maf             | Cdca3           |
| 10 | Als2cl          | Tnrc6b          | S100a6          | Klre1           | Eea1            | Klrd1           | Igfbp4          | Arl5a           | Stmn1           |
| 11 | Rps24           | Arhgap30        | Nebi            | Samd3           | Ptprs           | Dnajc15         | Actn1           | Lamc1           | Aurkb           |
| 12 | Tcf7            | Klrk1           | Nav2            | Klrc1           | Bhlhe40         | Hspe1           | Trnp1           | Klrg1           | Nusap1          |
| 13 | Rps27rt         | Ttc14           | Cxcr3           | Klra6           | Trps1           | 1700025G04Rik   | Sell            | Neb             | Cdca8           |
| 14 | Trib2           | Son             | Ly6a            | Ctsw            | Bcl2a1b         | Snhg1           | Tsc22d3         | Gm28112         | Cit             |
| 15 | Gm4332          | Birc6           | S100a11         | Tcrg-C4         | Nrp1            | Gpr18           | Tdrp            | Rapsn           | Mki67           |
| 16 | Rps16-ps2       | Fam107b         | P2rx7           | Spry2           | Gldc            | Atp8b4          | Sh3bp5          | Sdcbp2          | Hist1h2an       |
| 17 | Rflnb           | Tmem30a         | S100a10         | Klra1           | Phactr2         | Hspe1-rs1       | Tmem108         | Izumo1r         | Ccnb2           |
| 18 | Crif3           | Klra8           | Ltb4r1          | Il2rb           | Havcr2          | Gramd3          | Auts2           | Icos            | Kif11           |
| 19 | Gm15793         | Pnn             | Il1r1           | Tcrg-C2         | lfng            | Gm6477          | Lcn4            | Ncmap           | Cispn           |
| 20 | Actn1           | Sept9           | Itgb1           | Nkg7            | Tnfrsf4         | Nhp2            | Cmah            | Itgav           | Ube2c           |

**Supp Table 3. Primers used in the experiment.**

| <b>Gene</b>        | <b>Primer sequence</b>    |
|--------------------|---------------------------|
| <b>Scgb1a1-for</b> | GGTTATGTGGCATCCCTGAA      |
| <b>Scgb1a1-rev</b> | AGTGACAAGGCTTTAGCAGTAG    |
| <b>Cyp2f2-for</b>  | AGAAGGTTCTCTGTCCAAATCC    |
| <b>Cyp2f2-rev</b>  | CCAAGGGCTGCTCATAATCT      |
| <b>Scgb3a2-for</b> | CCTGTACCTTTGGACGACATTA    |
| <b>Scgb3a2-rev</b> | CCAGAGTGAGCAAATCCTTCT     |
| <b>Hp-for</b>      | GTGGTGGATATCGGGCTAATC     |
| <b>Hp-rev</b>      | CTTCTCGGGCACTGTACTATTC    |
| <b>Scgb1c1-for</b> | TGACTAGAGCAGAGGATGACA     |
| <b>Scgb1c1-rev</b> | TGTCGCTCATGGAAGTCAAG      |
| <b>Il1b-for</b>    | GGTACATCAGCACCTCACAA      |
| <b>Il1b-rev</b>    | TTAGAAACAGTCCAGCCCATAC    |
| <b>Ptgs2-for</b>   | CATTGACCAGAGCAGAGAGATG    |
| <b>Ptgs2-rev</b>   | GGCTTCCAGTATTGAGGAGAAC    |
| <b>Tnf-for</b>     | CTACCTTGTTGCCTCCTCTTT     |
| <b>Tnf-rev</b>     | GAGCAGAGGTTTCAGTGATGTAG   |
| <b>CD274-for</b>   | CTCCTACACATGCACACACATA    |
| <b>CD274-rev</b>   | GAGGATAGGCTGAGGGAATAGA    |
| <b>Arg1-for</b>    | CAGAGGTCCAGAAGAATGGAAG    |
| <b>Arg1-rev</b>    | TCCACCCAAATGACACATAGG     |
| <b>Arg2-for</b>    | GAAGAAGCTAGGAGTGGGAATATGG |
| <b>Arg2-rev</b>    | CACCTGACACAGCTCTACTAAC    |
| <b>Nos2-for</b>    | AGGAGGAGAGAGATCCGATTTAG   |
| <b>Nos2-rev</b>    | TCCAAGGTGCTTGCCTTATAC     |
| <b>Il6-for</b>     | CTTCACAAGTCGGAGGCTTAAT    |
| <b>Il6-rev</b>     | ACTCCAGGTAGCTATGGTACTC    |

**Supp Table 4. Antibodies used in the experiment.**

| <b>Species</b> | <b>Antigen</b>    | <b>Clone, Company</b> | <b>Dilution</b> | <b>Application</b>     |
|----------------|-------------------|-----------------------|-----------------|------------------------|
| <b>Mouse</b>   | anti-CD3          | 17A2, Biolegend       | 1:100           | Flow Cytometry         |
| <b>Mouse</b>   | anti-CD4          | RM4-5, Biolegend      | 1:100           | Flow Cytometry         |
| <b>Mouse</b>   | anti-CD8a         | 53-6.7, Biolegend     | 1:100           | Flow Cytometry         |
| <b>Mouse</b>   | anti-CD44         | IM7, Biolegend        | 1:100           | Flow Cytometry         |
| <b>Mouse</b>   | anti-CD45         | 30-F11, Biolegend     | 1:100           | Flow Cytometry         |
| <b>Mouse</b>   | anti-CD62L        | MEL-14, Biolegend     | 1:100           | Flow Cytometry         |
| <b>Mouse</b>   | anti-Ki67         | 11F6, Biolegend       | 1:100           | Flow Cytometry         |
| <b>Mouse</b>   | anti-PD-1         | 29F.1A12, Biolegend   | 1:100           | Flow Cytometry         |
| <b>Mouse</b>   | anti-TNFA         | MP6-XT22, Biolegend   | 1:100           | Flow Cytometry         |
| <b>Mouse</b>   | anti-IFNg         | XMG1.2, Biolegend     | 1:100           | Flow Cytometry         |
| <b>Mouse</b>   | Anti-CC10         | E-11, Santa Cruz      | 1:50            | Flow Cytometry         |
| <b>Mouse</b>   | anti-EpCAM        | G8.8 Biolegend        | 1:100           | Flow Cytometry         |
| <b>Mouse</b>   | anti-GzmB         | GB11 Biolegend        | 1:100           | Flow Cytometry         |
| <b>Mouse</b>   | anti-PD-1         | RMP1-14 BioXCell      | 250ug/dose      | In vivo neutralization |
| <b>Mouse</b>   | IgG2a             | 2A3 BioXCell          | 250ug/dose      | In vivo neutralization |
| <b>Mouse</b>   | anti-E-Cadherin   | DECMA1 Biolegend      | 1:40            | Immunofluorescence     |
| <b>Mouse</b>   | anti-CD45         | 30-F11 Biolegend      | 1:25            | Immunofluorescence     |
| <b>Mouse</b>   | anti-PD-1         | RMP1-30 eBioscience   | 1:25            | Immunofluorescence     |
| <b>Mouse</b>   | anti-PD-L1        | 10F.9G2 Biolegend     | 1:25            | Immunofluorescence     |
| <b>Mouse</b>   | anti-CD8          | 53-6.7 Biolegend      | 1:25            | Immunofluorescence     |
| <b>Mouse</b>   | Anti-CC10         | E-11, Santa Cruz      | 1:25            | Immunofluorescence     |
| <b>N/A</b>     | Anti-Flag         | Enzo lifescience      | 1:1000          | Western Blot           |
| <b>Mouse</b>   | Anti-JAK/Stat kit | Cell signaling        | 1:1000          | Western Blot           |
